# Supplementary material for: LongITools: Dynamic longitudinal exposome trajectories in cardiovascular and metabolic noncommunicable diseases
Source: PubMed Central journal article supplement (PMC8835657; doi:10.1097/ee9.0000000000000184), 2021-12-28

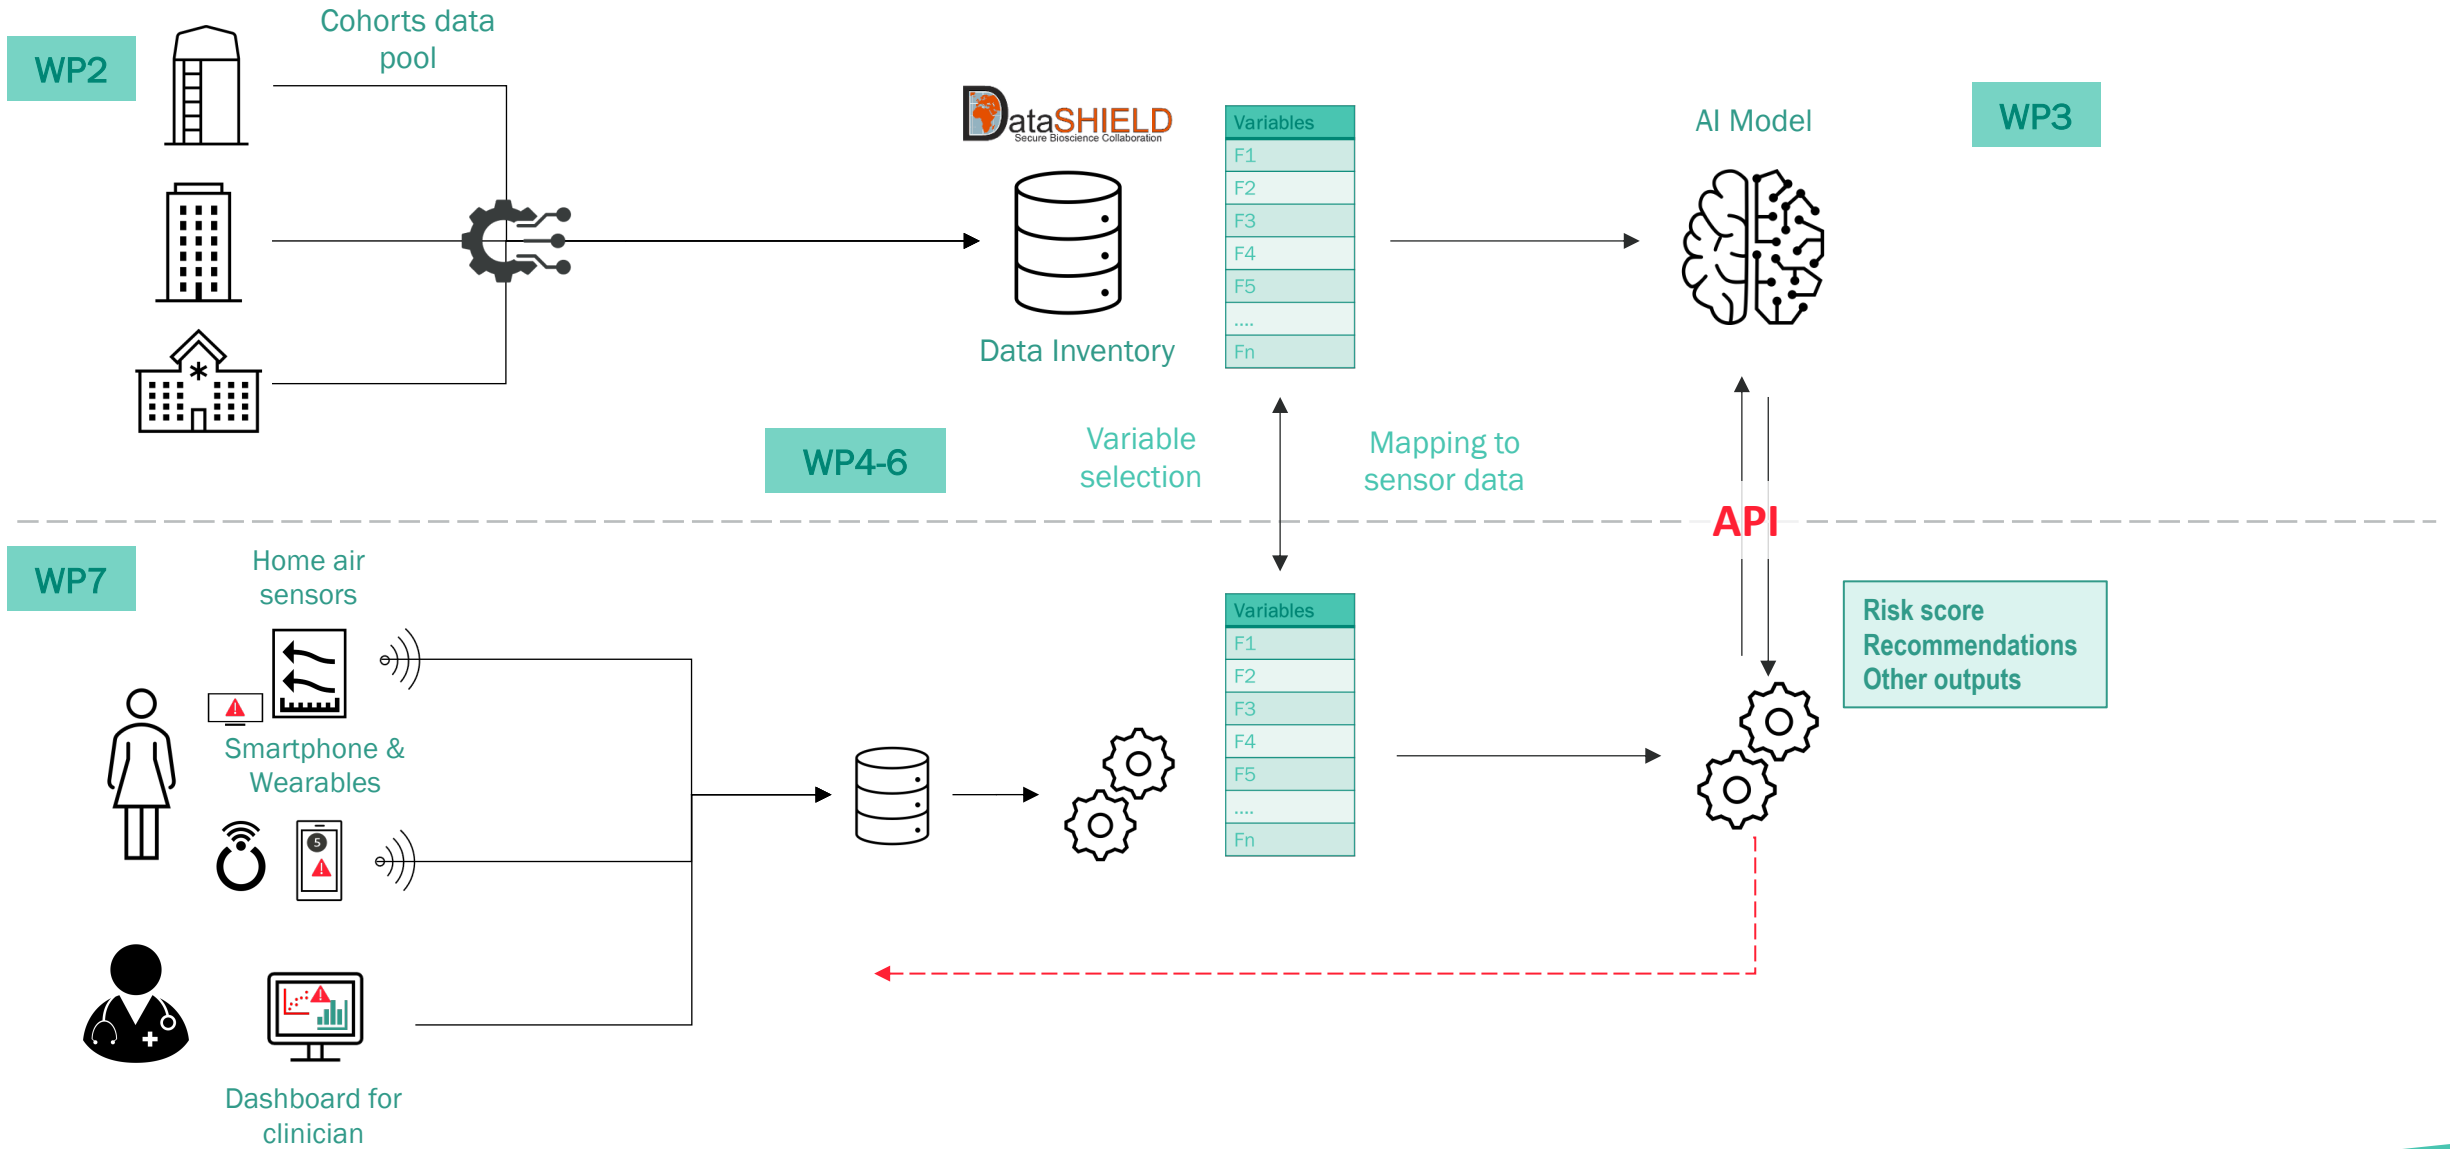

Supplement: ee9-6-e184-s002.pdf [file ee9-6-e184-s002.pdf]
